# Supplementary material for: Stress-Related Chronic Fatigue Syndrome: A Case Report with Positive Response to Alpha-Methyl-P-Tyrosine (AMPT) Treatment
Source: Preprints.org preprint supplement (doi:10.20944/preprints202406.1544.v1), 2024-06-21
Supplement: Supplementary file 1 [file supplementary]

## Sheet: allergy
Measure	Category	Normal range	Unit	Level	December 2021
Acidified Milk Produce	allergy	<20	ug/ml	High	>200*
Almond	allergy	<20	ug/ml	High	154.2*
Apple	allergy	<20	ug/ml	Normal	<2.5
Arugula	allergy	<20	ug/ml	Normal	<2.5
Avocado	allergy	<20	ug/ml	Normal	<2.5
Baker'S Yeast	allergy	<20	ug/ml	Normal	5.4
Banana	allergy	<20	ug/ml	Normal	<2.5
Basil	allergy	<20	ug/ml	Normal	3.5
Bean Green	allergy	<20	ug/ml	Normal	<2.5
Beef	allergy	<20	ug/ml	Normal	6
Bell Pepper	allergy	<20	ug/ml	High	26.5*
Boiled Milk	allergy	<20	ug/ml	High	>200*
Broccoli	allergy	<20	ug/ml	Normal	5.7
Buckwheat	allergy	<20	ug/ml	Normal	9.7
Carrot	allergy	<20	ug/ml	Normal	<2.5
Casein	allergy	<20	ug/ml	High	>200*
Cashew	allergy	<20	ug/ml	High	127*
Cauliflower	allergy	<20	ug/ml	Normal	<2.5
Cayenne Pepper	allergy	<20	ug/ml	Normal	15.3
Celery	allergy	<20	ug/ml	Normal	<2.5
Chamomile	allergy	<20	ug/ml	Normal	<2.5
Cherry	allergy	<20	ug/ml	Normal	15.6
Chicken	allergy	<20	ug/ml	Normal	6.3
Chicken Egg Lgg--	allergy	<20.0	μg/ml	High	>200.0*
Cocoa Bean	allergy	<20	ug/ml	Normal	3
Corn	allergy	<20	ug/ml	Normal	18.2
Cow'S Milk	allergy	<20	ug/ml	High	>200*
Cow'S Milk Lgg"	allergy	<20.0	μg/ml	High	>200.0*
Cubiskeme	allergy	<20	ug/ml	High	37.7*
Cucumber	allergy	<20	ug/ml	Normal	<2.5
Eggplant	allergy	<20	ug/ml	Normal	4.7
Garlic	allergy	<20	ug/ml	Normal	13.1
Ginger	allergy	<20	ug/ml	Normal	18
Gluten	allergy	<20	ug/ml	High	23.5*
Goat Milk	allergy	<20	ug/ml	High	120.3*
Grape/Raisin	allergy	<20	ug/ml	Normal	<2.5
Hamsure	allergy	3.5-7.2		High	9.3*
Hazelnut	allergy	<20	ug/ml	High	174.7*
Hazelnut Lgg--	allergy	< 20.0	μg/ml	High	186.9*
Hen'S Egg	allergy	<20	ug/ml	High	189.8*
Herring	allergy	<20	ug/ml	Normal	<2.5
Histamine	allergy	<32	ug/g	High	41.9*
Histamine I. Stuhl	allergy	<1425	ng/ml	Normal	<200
Iceberg Lettuce	allergy	<20	ug/ml	Normal	3.9
Kiwi	allergy	<20	ug/ml	High	30.2*
Leek	allergy	<20	ug/ml	Normal	5.9
Lemon	allergy	<20	ug/ml	Normal	<2.5
Lettuce	allergy	<20	ug/ml	Normal	2.9
Linseed	allergy	<20	ug/ml	High	48*
Mushroom	allergy	<20	ug/ml	Normal	<2.5
Mustard Seed	allergy	<20	ug/ml	Normal	7.3
Mustard Seed Lgg"	allergy	< 20	μg/ml	Normal	14.3
Nectarine	allergy	<20	ug/ml	Normal	<2.5
Oats	allergy	<20	ug/ml	Normal	12.2
Onion	allergy	<20	ug/ml	Normal	18.4
Orange	allergy	<20	ug/ml	Normal	<2.5
Oregano	allergy	<20	ug/ml	Normal	<2.5
Pangasius	allergy	<20	ug/ml	Normal	<2.5
Parsley	allergy	<20	ug/ml	Normal	5.1
Pea	allergy	<20	ug/ml	High	38.2*
Peach	allergy	<20	ug/ml	Normal	<2.5
Peanut	allergy	<20	ug/ml	High	33.3*
Pepper	allergy	<20	ug/ml	Normal	6.6
Peppermint	allergy	<20	ug/ml	Normal	<2.5
Pineapple	allergy	<20	ug/ml	Normal	16.5
Pineapple Lgg--	allergy	<20	μg/ml	Normal	19.1
Plaice	allergy	<20	ug/ml	Normal	<2.5
Pollock	allergy	<20	ug/ml	Normal	3.3
Poppy	allergy	<20	ug/ml	Normal	7.6
Pork	allergy	<20	ug/ml	Normal	<2.5
Potato	allergy	<20	ug/ml	Normal	6.9
Praprica Root	allergy	<20	ug/ml	Normal	15.8
Quail Egg	allergy	<20	ug/ml	High	173.4*
Raspberry	allergy	<20	ug/ml	Normal	5.4
Rice	allergy	<20	ug/ml	Normal	3.3
Rosemary	allergy	<20	ug/ml	Normal	<2.5
Rye	allergy	<20	ug/ml	Normal	14.4
Salmon	allergy	<20	ug/ml	Normal	<2.5
Sesame	allergy	<20	ug/ml	High	37.1*
Sheep Milk	allergy	<20	ug/ml	High	98.6*
Shrimp	allergy	<20	ug/ml	Normal	7.2
Soybean	allergy	<20	ug/ml	Normal	15.5
Spec Control Lgg-	allergy	<20	μg/ml	Normal	4.8
Spelt/Grain	allergy	<20	ug/ml	High	30.9*
Spinach	allergy	<20	ug/ml	Normal	<2.5
Strawberry	allergy	<20	ug/ml	Normal	4.7
Sunflower Seeds	allergy	<20	ug/ml	High	74.7*
Thyme	allergy	<20	ug/ml	Normal	<2.5
Tomato	allergy	<20	ug/ml	Normal	7.7
Tomato Tgg"	allergy	< 20	μg/ml	Normal	12.5
Trout	allergy	<20	ug/ml	Normal	<2.5
Tuna	allergy	<20	ug/ml	Normal	9.2
Turkey	allergy	<20	ug/ml	Normal	6.1
Vanilla	allergy	<20	ug/ml	Normal	<2.5
Walnut	allergy	<20	ug/ml	Normal	<2.5
Wheat	allergy	<20	ug/ml	High	53.5*
Wheat L9G"	allergy	< 20	μg/ml	High	38.4*
Zirnt	allergy	<20	ug/ml	Normal	<2.5
Zucchini	allergy	<20	ug/ml	Normal	2.9

## Sheet: aminoacids
Measure	Category	Normal range	Unit	Level	July 2022
4-Hydroxyproline	aminoacid	0.9-6.4	mg/l	Low	0.8*
Alanine	aminoacid	30.1-70.3	mg/l	Low	23.8*
Arginine	aminoacid	3-22.3	mg/l	Normal	8.6
Asparagine	aminoacid	4-22.3	mg/l	Normal	5.5
Citrulline	aminoacid	3.5-9.6	mg/l	Normal	5.5
Cystathione	aminoacid	<0.3	mg/l	Normal	<0.1
Glycine	aminoacid	11.9-36.8	mg/l	Normal	20.0
Histidine	aminoacid	9.4-16.8	mg/l	Normal	9.4
Isoleucin	aminoacid	5.3-31.3	mg/l	Normal	6.8
Leucin	aminoacid	14.4-34.4	mg/l	Normal	14.8
Lysine	aminoacid	19.7-48.5	mg/l	Normal	24.6
Methionine	aminoacid	2.5-6.3	mg/l	Normal	2.7
Ornithine	aminoacid	12.3-25.8	mg/l	Low	11.8*
Phenylalanine	aminoacid	7.9-14	mg/l	Low	7.2*
Proline	aminoacid	19-37.9	mg/l	Normal	21.2
Serine	aminoacid	9.6-19	mg/l	Normal	14.2
Threonine	aminoacids	13-26.8	mg/l	Normal	16.7
Valin	aminoacids	21.4-60.9	mg/l	Normal	24.9

## Sheet: cholesterol
Measure	Category	Normal range	Unit	Level	January 2012	March 2013	September 2013	August 2017	November 2019	October 2021	November 2022	June 2022
Cholesterol (total)	cholesterol	<200	mg/dl	High	5.51	194	185	169	191	200*	227*	215*
Cholesterol HDL	cholesterol	>40	mg/dl	Normal			60	63	53	56	68	55
Cholesterol LDL/HDL	cholesterol	<4	Quotient	Normal	1.9				2.32	2.4
Cholesterol nonHDL	cholesterol	< 145	Rech	Normal				105.6	138
Cholesteror LDL	cholesterol	<160	mg/dl	Normal			128		123	134	143	138

## Sheet: hematogram
Measure	Category	Normal range	Unit	Level	March 2013	November 2013	September 2013	February 2014	August 2017	September 2017	November 2017	February 2020	September 2021	October 2021	October 2021 (2)	June 2022	July 2022	November 2022	November 2022 (2)	November 2023
Basophile	general health/ blood counts	<2	%	Normal											0.7				0.6
Basophile Abs	general health/ blood counts	15-50	ul	High											50
Basophile Gran	general health/ blood counts	bis 2	%	Normal												1			4.74
Basophile Gran Abs	general health/ blood counts	0.010-0.08	Tsd/ul	Normal												0.03
Basophile Granulocite	general health/ blood counts	<1.8	%	Normal										0.9					0.66
Basophile Granulocite Abs	general health/ blood counts	<20	%	Normal										0.05					1.54
Eosinophil Granulocytes	general health/ blood counts	1 to 7	%	High							7.9*	7	6.1	9.2*	1.8	6		2	24*
Eosinophil Granulocytes Abs	general health/ blood counts	0.030-0.440	Tsd./ul	Normal												0.34		0.12
Eosinophile Abs	general health/ blood counts	40-400	ul	Normal											130				128
Eosinophile Granulocite	general health/ blood counts	0.02-0.50	1000/ul	Normal										0.5
Glutathion (Gh) Intracellular Monocyte (CD14)	general health/ blood counts	>66600	mfi	Low													66183*
Immature Granulocyte	general health/ blood counts	<0.6		Normal										0.2
Monocyte	general health/ blood counts	4 to 12	%	Normal															4.2
Monocyte Absolute	general health/ blood counts	2-9.5	%	Normal							7.7	10	9.7	7.9	7.7	8		8		3.5
Act. T-Lympho. CD 8/CD 57 Rel	general health/ blood counts	<30	cells	High									47.99*						4.88/4.83
Act. T-Lympho. CD8/CD11A Abs	general health/ blood counts	<450	cells	High									721*
Act. T-Lympho. CD8/CD11A Rel.	general health/ blood counts	<30	cells	High									68.14*
Act. T-Lympho. CD8/CD28 Abs	general health/ blood counts	>780	cells	Low									503*
Act. T-Lympho. CD8/CD28 Rel	general health/ blood counts	>60	cells	Low									47.58*
Act. T-Lympho. CD8/CD57 Abs.	general health/ blood counts	0-450	cells	High									508*							44
Act.T-Lympho. Hla-Dr+ Absol	general health/ blood counts	30-200	cells	Low									13*
Act.T-Lympho. Hla-Dr+ Relativ	general health/ blood counts	2 to 12	cells	Low									1.24*
Aptt	general health/ blood counts	26-40	sec	Low/High			10.3*													93.6*
Basophilic Granulocytes	general health/ blood counts	0.010-0.080	Tsd./ul	Normal														0.03
Basophils	general health/ blood counts	0-2	%	Normal							0.5	1	1.2					1
B-Lympho CD19 Abs	general health/ blood counts	100-500	cells	Normal									186							126
B-Lympho CD19 Rel	general health/ blood counts	6 to 19	cells	Normal									17.61						.
Glutathion (Gh) Intracellular Lymphozyte T (CD3)	general health/ blood counts	>21600	mfi	Low													17280
Granulocite Immature	general health/ blood counts	<0.6	1000/ul	Normal										0.2
Granulocite Immature Abs	general health/ blood counts	<0.06	1000/ul	Normal										0.01
Hematocri	general health/ blood counts	40-50	%	Normal	48.6	48	49	45	42.8	46.9		49.4	46		49
Hemoglobin	general health/ blood counts	13.5-17.2	g/dl	Low	16.1	10*	16.1	9.3*	14	15.4	16	15.6		15.7	15.4	15.5		15.6
Hemoglobin A1C	general health/ blood counts	<5.7	%	High										5.9*					16.3
Hemoglobin A1C	general health/ blood counts	<39	mmol/mol	High										41*
Hemolytic	general health/ blood counts	0-80		Normal			17
Hemolytic	general health/ blood counts	0-80		Normal			7
Hypochr.Ery	general health/ blood counts	0-5	Not provided	Normal	3															20
Icteric	general health/ blood counts	0-10		Normal			1
Leuko/ Urine	general health/ blood counts			Normal	neg
Leukocyte	general health/ blood counts	3.5-9.8	Tsd/ul or G/l	High	5.4	5.7	5.62	5.8	11.6*	4.5	6.6	4.8	5.06	5.4	7.2	5.5		6
Lymphocite %	general health/ blood counts	17-47	%	Normal							24.8	32	20.9	28.5	18.1	32
Lymphocite Absolute	general health/ blood counts	1200-3200	ul	Normal											1303	1750
Lymphocite Absolute	general health/ blood counts	1.10-4.5	%	Normal										1.55
Lymphocytes	general health/ blood counts	17 - 47	%	Low														15*
Lymphocytes	general health/ blood counts	1.100 - 3.200	Tsd./ul	Low														0.9*
Lymphozyte	general health/ blood counts	1.36-3.35	Gpt/L	Low									1.06*
Mch	general health/ blood counts	28-33	pg/Ery	Normal	31.1		30				29.8	29.4		31	30	30.9		30.4
Mch	general health/ blood counts	1.676-2.005	fmol	Normal									1855
Mchc	general health/ blood counts	31.5-36	g/dl	Normal			33.2		32.7	32.8	34.1	31.6		34.9	31.7*	33.3		33.4
Mchc	general health/ blood counts	20.1-21.7	mmol/l	Normal		21		20.9					20.7							42.1
Mcv	general health/ blood counts	80-96	fl	Normal	93.9	92.6	91	91.8	92	90.2	87.3	93.2	89.5	88.8	94	92.6		90.9		41.5
Mpv	general health/ blood counts	9.3-12.1	fL	High									9.4						33*	14.9*
Neutrophi Gran Abs	general health/ blood counts	1800-6200	Tsd/ul	Normal											5162	2870
Neutrophil Granulocite	general health/ blood counts	42-77	%	Normal							59.1	50	62.1	53.3	71.7	53		74
Neutrophil Granulocytes Absolute	general health/ blood counts	1.70-6.80	Tsd./ul	Normal	3.06									2.89				4.43
Neutrophyle Granulocite	general health/ blood counts	1.50-7.70	1000/ul	Normal										2.89
Platelets	general health/ blood counts	150-370	G/1 and Tsd/ul	Normal							328	301	285
Ptt (Part. Thromboplastin Time)	general health/ blood counts	26-37	sec	Normal	36													30.9
Quick (Prothrombin Time)	general health/ blood counts	15-65	pg/ml	Normal												26
Quick (Prothrombin Time) (Tpz)	general health/ blood counts	82-121	%	Normal	91		94											92
Rdw-Cv Red Blood Cell Distribution Width	general health/ blood counts	2023-09-17	%	Normal		13.3	12.8	13.2	13.8	13.2				12.9				12.6
Reticulocyte Abs	general health/ blood counts	0.43-1.36	%	Normal												0.79
Thrombocytes	general health/ blood counts	150-370	Tsd/ul	Normal	239	260	252	284	304	271				283	302	314
Erythroblasts	general health/ blood counts	0	%	Normal			0
Erythrocyte Distribution	general health/ blood counts	<14.8	%	Normal												12.9
Erythrocytes	general health/ blood counts	4.3-5.75	mill/ul or T/l	Normal	5.2	5.13	5.4	4.85	4.65	5.2	5.37	5.3	5.12	5.07	5.17	5.02		5.14
Ebv-Capsid Vca Igg	general health/ blood counts	<20=negative	E/ml	High=positive															64.6

## Sheet: immune
Measure	Category	Normal range	Unit	Level	September 2021	October 2021	November 2021	November 2022	June 2022	July 2022	November 20222	November 2023
Alpha 1 Globulin	Immunology	2.9-4.9	%	Normal		2		3.5	3.4
Alpha 2 Globulin	Immunology	7.4-12.6	%	Low		7.5		6.9*	6.9*
Beta 1 Globulin	Immunology	4.7-7.2	%	Normal				4.7	4.9
Beta 2 Globulin	Immunology	3.2-6.5	%	Normal				4.1	4.2
Beta Globulin	Immunology	7.5-12.9	%	Normal		7.6
C3 Complement	Immunology	0.90-1.80	g/L	Normal	0.94
C4 Complement	Immunology	0.10-0.40	g/L	Low	0.09*
Cd16/56 Absol	Immunology	90-600	cells	Low	79*
Cd16/Cd56 Rel	Immunology	7 to 31	%	Normal	7.44
Cd4/Cd8 Ratio	Immunology	1-3.6		Normal	1.62
Cd8+Cd38+ Absol	Immunology	0-400	cells	Normal	68
Cd8+Cd38+ Relat	Immunology	0-20	%	High	6.39						95-447*
Dao (Diaminooxidase)	Immunology	14-33	IU/ml	Normal		15.6	19.2
Gamma Globulin	Immunology	11.1-18.8	%	Normal		13.7		16.5	16.8
Ifn Gamma Stimulates	Immunology	<0.2	pg/ml	High		1.1*
Iga	Immunology	70-400	mg/dl	Normal		138
Ige Total	Immunology	1.31-165.3	IU/ml	Normal	133.1
Igf-1	Immunology	70-290	ng/ml	Normal					165.2
Igg	Immunology	700-1600	mg/dl	Normal		1261
Igg Sub 4	Immunology	0.052-1.25	g/L	Normal	1.64
Igg Sub1	Immunology	2.8-8	g/L	Low	6.2						2.05*	1.09*
Igg Sub2	Immunology	1.15-5.70	g/L	Normal	4.7
Igg Sub3	Immunology	0.24-1.25	g/L	Normal	0.76						0	7.2*
Igm	Immunology	40-230	mg/dl	Normal		97
Il10	Immunology	<9.1	pg/ml	Normal	<5	<10
Il10 Stimulates	Immunology	51-370	pg/ml	High			447*
Il12	Immunology	0-5.9	pg/ml	Normal			0.9				3.9
Il1B	Immunology	65-762	pg/ml	Normal			211
Il2 Receptor	Immunology	223-710	IU/ml	Normal	335
Il6	Immunology	<6.4	pg/ml	Normal	0.98
Il6	Immunology	2879-5956	pg/ml	Normal			5729*
Il8	Immunology	<62	pg/ml	Normal	13.2
Il8	Immunology	>5000	pg/ml	Normal			>5000					160
Immunoglobulin A	Immunology	0.7-4.9	g/L	Normal	1.46			1.53	1.6
Immunoglobulin E	Immunology	<100	U/ml	Normal					92
Immunoglobulin G	Immunology	7 to 16	g/L	Normal	12.44			12.42	12.18
Immunoglobulin G1	Immunology	2.8-8	g/L	Normal		6.1
Immunoglobulin G2	Immunology	1.15-5.70	g/L	Normal		5.16					5.1/5.0
Immunoglobulin G3	Immunology	0.24-1.25	g/L	Normal		0.87
Immunoglobulin G4	Immunology	0.05-1.25	g/L	HIgh		1.41*
Immunoglobulin M	Immunology	0.4-2.3	g/L	Normal	1			1.04	0.95
Ip-10	Immunology	<900	pg/ml	Normal		309					4.46
Mannose Bind Lectin	Immunology	>450	ng/ml	Low		225*
Nitrotyrosin	Immunology	<630	nmol/l	Normal		<200				259
Nk Cell (Cd16/56) Intracellular	Immunology	>30500	mfi	Low						27841*		4.79
Nk Cell Activity	Immunology	>10	%	Low			1.3*
Open T4	Immunology	8-16.5	pmol/l	Normal	10.03
Proleucin (Stimulation Control)	Immunology	none	none	Normal			1.8
Rantes	Immunology	<30	ng/ml	Normal		26.5
T-Helper Cells Cd4 Absolute	Immunology	300-1400	cells/ul	Normal	459						5560
T-Lymphozyte Cd3 Absolute	Immunology	700-2100	cells/ul	High	788						>5000*
Tnf Alpha	Immunology	<8.1	pg/ml	Normal	6.1	6.6
Tnfalpha	Immunology	255-1248	pg/ml	Normal			491				533
T-Supressor Cells Cd8 Absol	Immunology	200-900	cells	Normal	283

## Sheet: metagenomics
Measure	Category	Normal range	Unit	Level	February 2013
Acetanaerobacterium	metagenomics	<5	g	Normal	0.02
Acetivibrio	metagenomics	<1	g	Normal	0.93
Actinomyces	metagenomics	<1	g	Normal	0.02
Alistipes	metagenomics	<3	g	Normal	0
Anaerofustis	metagenomics	<0.5	g	Normal	0
Anaerostipes	metagenomics	<1	g	Normal	0.33
Asaccharobacter	metagenomics	>0.1	g	Low	0*
Bacteroides	metagenomics	<10	g	Normal	0.31
Barnesiella	metagenomics	<2	g	Normal	0.07
Bifidobacterium	metagenomics	>5	g	Low	0*
Blautia	metagenomics	<50	g	Normal	7.05
Butyricicoccus	metagenomics	<5	g	Normal	0
Catenibacterium	metagenomics	<0.3	g	Hig	0.36*
Clostridium	metagenomics	<5	g	Normal	0.81
Collinsella	metagenomics	<25	g	Normal	0.07
Coprobacillus	metagenomics	<1	g	Normal	0
Coprococcus	metagenomics	<10	g	High	11.91*
Dialister	metagenomics	0-1	g	Normal	0
Dorea	metagenomics	<15	g	High	17477*
Enterococcus	metagenomics	0	g	Normal	0
Escherichia/Shigella	metagenomics	<0.5	g	Normal	0
Ethanoligenens	metagenomics	<1	g	Normal	0
Eubacterium	metagenomics	0	g	Normal	0
Faecalibacterium	metagenomics	<25	g	Normal	0.84
Holdemania	metagenomics	<1	g	Normal	0
Howardella	metagenomics	<1	g	Normal	0
Klebsiella	metagenomics	<0.5	g	Normal	0
Lactobacillus	metagenomics	<1	g	Normal	0
Lactococcus	metagenomics	<1	g	Normal	0.31
Lactonifactor	metagenomics	0	g	Normal	0
Lawsonia	metagenomics	<0.5	g	Normal	0
Leuconostoc	metagenomics	<0.3	g	Low	0.04*
Megamonas	metagenomics	0	g	Normal	0
Megasphera	metagenomics	0	g	Normal	0
Moryella	metagenomics	<1	g	Normal	0
Odoribacter	metagenomics	<0.5	g	Normal	0
Olsenella	metagenomics	0	g	Normal	0
Oscillibacter	metagenomics	<4	g	Normal	2.84
Papillibacter	metagenomics	<1	g	Normal	0.02
Parabacteroides	metagenomics	<3	g	Normal	0.18
Prevotella	metagenomics	<5	g	Normal	0.64
Roseburia	metagenomics	<50	g	Normal	37.03
Rothia	metagenomics	<0.2	g	Normal	0
Ruminococcus	metagenomics	>2	g	Low	0.24*
Slackia	metagenomics	<1	g	Normal	0
Sporobacter	metagenomics	<1	g	Normal	0.04
Sporobacterium	metagenomics	<1	g	Normal	0
Staphylococcus	metagenomics	<0.05	g	Normal	0
Streptococcus	metagenomics	<5	g	Normal	0
Subdoligranulum	metagenomics	<25	g	Normal	7.33
Sutterella	metagenomics	<1	g	Normal	0.11
Syntrophococcus	metagenomics	<1	g	Normal	0.27
Turicibacter	metagenomics	>0.5	g	Normal	2.22
Xylanibacter	metagenomics	<1	g	Normal	0

## Sheet: toxicology-minerals
Measure	Category	Normal range	Unit	Level	March 2013	September 2013	November 2019	February 2020	September 2021	October 2021	October 21 (2)	June 2022	July 2022	November 2022	March 2023
Aluminium	toxicology clinical chemisrtry	<11.4	ug/l	Normal						<10	7.3
Arsenic	toxicology clinical chemisrtry	<1.2	ug/l	Normal						0.5	0.8
Bore	toxicology clinical chemisrtry	22-88	ug/l	Normal							27.85
Cadmium	toxicology clinical chemisrtry	<0.6	ug/l	Normal						<0.2	<0.2
Calcium	toxicology clinical chemisrtry	2.1-2.65	mmol/l	Normal	2.5	2.53	2.46		2.48	2.5		2.53
Calcium	toxicology clinical chemisrtry	55-71	mg/l	High						56	56.3			78*
Chloride	toxicology clinical chemisrtry	98-107	mmol/l	Normal								100
Cobalt	toxicology clinical chemisrtry	0.06-0.4	ug/l	High							0.69
Copper	toxicology clinical chemisrtry	0.7-0.94	mg/l	Normal						0.7	0.75		0.66-0.73
Copper	toxicology clinical chemisrtry	0.85-1.05	mg/l	Low							0.77
Ferritin	toxicology clinical chemisrtry	20-250	ng/ml or mg/l	Normal					90.5	97	69.1	88
Iodine	toxicology clinical chemisrtry	30-63	ug/l	Normal							30.8
Iron	toxicology clinical chemisrtry	60-160	ug/dl	Normal	103		72	101				75
Iron	toxicology clinical chemisrtry	14-32	umol/l	Normal						20
Iron	toxicology clinical chemisrtry	460-515 or 465-577 (nov22)	mg/l	Normal							506
Lead	toxicology clinical chemisrtry	<28	ug/l	Normal						12.9	8.77
Magnesium	toxicology clinical chemisrtry	1.8-2 .7	mgldl// mmol/l	Normal			2						2.2
Magnesium	toxicology clinical chemisrtry	30-40	mg/l	Normal						32.9	36.3
Magnesium	toxicology clinical chemisrtry	0.70-1.10	mmol/l	Normal								0.91
Manganase	toxicology clinical chemisrtry	6.5-13	ug/l	High						12.5	14.73*		13.8*
Mercury	toxicology clinical chemisrtry	<1	ug/l	High									2.7
Molibdenum	toxicology clinical chemisrtry	0.3-1.3	ug/l	Normal						0.8	0.66		0.8
Nickel	toxicology clinical chemisrtry	<1	ug/l	Normal						0.4	<0.25
Osteocalcin	toxicology clinical chemisrtry	0.60-3.30	ng/ml	High						3.95*
Phosphor	toxicology clinical chemisrtry	365-577	mg/l	Normal						441	394.83
Potassim/calcium	toxicology clinical chemisrtry	29.5-32.5		High							30.79				39*
Potassium	toxicology clinical chemisrtry	1386-1950	mg/l	Normal						1655	1861
Potassium	toxicology clinical chemisrtry	3.5-5.1	mmol/l	No	4.2	4.4	4.8		4.56	5.1		4.4
Potassium intracellular	toxicology clinical chemisrtry	95-100	mmol/l	Low									83.9*
Potassium/sodium	toxicology clinical chemisrtry	0.87-0.97		No							0.95
Selenium	toxicology clinical chemisrtry	100-230	ug/l	High						137	160.53		121	818*
Selenium	toxicology clinical chemisrtry	100-140	ug/l	High							147.56*
Selenium intracellular	toxicology clinical chemisrtry	74-163	ug/l	High									194*
Silver	toxicology clinical chemisrtry	<1.7	ug/l	Normal						1.2	1.56
Sodium	toxicology clinical chemisrtry	1500-1850	mg/l	Normal						1514	1828
Sodium	toxicology clinical chemisrtry	136-145	mmol/l	Normal	140	142	142		137.5	143		139
Thalium	toxicology clinical chemisrtry	<0.1	ug/l	Normal							0.03
Tin (pewter) german zinn	toxicology clinical chemisrtry	<0.30	ug/l	Normal							<0.10
Transferin	toxicology clinical chemisrtry	200-360	mg/dl	Normal				234		242		233
Vanadium	toxicology clinical chemisrtry	<0.1	ug/l	Normal							0.06
Zink	toxicology clinical chemisrtry	7-7.6	mg/l	Low						5.9*	7.2			<1*	<0.8*
Zink	toxicology clinical chemisrtry	4.5-7.5	mg/l	Normal									5.2
Zink intracellular	toxicology clinical chemisrtry	8.8-14.2	mg/l	Normal									12.2

## Sheet: vitamins
Measure	Category	normal range	unit	Level	September 2012	September 2021	October2021	October 2021 (2)	November 2021	June 2022	July 2022	November 2022	November 2023
Vitamin B1	micronutrients	>39.8	ug/l	Low			30.9*
Vitamin B1. intracellular	micronutrients	75.8-174	ug/l	Normal							100
Vitamin B12 (cobalamin)	micronutrients	180-914	pg/ml	Normal		442
Vitamin B12 (cobalamin)	micronutrients	197-771	pg/ml	High *taking supplement						1142*
Vitamin B12 (cobalamin)	micronutrients	>358	ng/l	Normal	530		455
Vitamin B2	micronutrients	>85.4	ug/l	Normal			202				290
Vitamin B3	micronutrients	5.32-7.78	umol/l	Normal				6.01
Vitamin B6	micronutrients	>10.1	ug/l	Low			3.11*
Vitamin B6. intracellular	micronutrients	20-50	ug/l	Low							27.6	17.4*
Vitamin C	micronutrients	2020-06-01	ug/ml	Normal				13.2
Vitamin D (25-OH) calcidiol	micronutrients	30-100	ng/ml	Low		23.11*							4.1*
Vitamin D (25-OH) calcidiol	micronutrients	100-150	nmol/l	High *taking supplemet					285*
Vitamin D 25 OH free	micronutrients	8.49-28.3	pg/ml	Low			6.13*
Vitamine B9/12 (folic acid)	micronutrients	>100	ug/l	Low/*Taking supplement			72.7*					1599*
Vitamine D3 1.25 (OH)2 calcitriol	micronutrients	19.9-79.3	pg/ml	High					106*

## Sheet: leftover measures
Measure	Category	normal range	unit	altered	6/6/2012	8/1/2012	8/29/2012	3/28/2013	2/19/2013	4/11/2013	20-Sep-13	12-Feb-14.	3 August 2017.	1-September 2017.	8-Nov-19	13-Feb-20	17-Feb-20	16-Sep-21	7-Oct-21	2-Nov-22	18-Nov-22	23-Nov-21	25-Nov-22	19-Oct-21	20-Dec-21	1-Jun-22	10-Jun-22	25 July 2022	2022-11-01	3/11/2023 (blood)	4/12/23 (urine)	(second time point 4/12/23) SU and SU/d	(third time point 4/12/23) SU and SU/d
BZ-P1	?	55-100	Not provided	No		4.65							99
BZ-P2	?		Not provided	No		3.36
f.ThyroJCin (fT4) na/1 9.30-17.00	?	9.30-17	ng/l	No							10.36
AGE i.S.	??	<67	ug/ml	No																								28.4
Glutathion in erytrozyte (GSH, reduced form)	antioxidant	3.1-5.9	mmol/l	No																				4						2.4
AK	antioxidant capacity	1.07-1.53	mmol/l	No																1.33
ANA (anti-nuclear)	autoimmunology	<1:100	U/ml	No															<1:100										53.3
SS_A(Ro)-Aak	autoimmunology	<20	RE/ml	No															4.6											negat
Bile acids i. stool	Bad diggestion	0.46-9.96	umol/g	No																	1.45									negat
Pancreatic elastase in stool	Bad diggestion	>200	ug/g	No																	246.2
alpha-amylase	carbohydrate breakdown	bis 110	U/l	No																							60
amylase	carbohydrate breakdown	13-53 or <100	U/l	Yes							63								69
Amylase	carbohydrate breakdown	13-53	U/l	Yes							80
CK	clinical chemisrtry	< 190	un	Yes											205 +
CKD-EPI	clinical chemisrtry	>60	ml/min/1.73n	No											115
Urea--N	clinical chemisrtry	5 to 26	mg/dl	No											12.6
Uric acid	clinical chemisrtry	< 7.0	mgldl	Yes/NO last time											7.4 +
Uric acid	clinical chemisrtry	3.6-7	mg/dl	No							7.7								5.3	5.1							6.8
Trycliceride	clinical chemisrtry/fat	<150 or <200	mg/dl	No		0.72		143			63		105		133				99	58							87
Urea	clinical chemisrtry/kidney	19-44	mg/dl	Yes/NO last time				>50			28				27				23	24
Ammoniac	clinical chemistry	31-123	ug/dl	No																		90.5
Creatinine	clinical chemistry	0.7-1.2/ not specified/ last 39-259 mg/dl and 1.04-2.35 g/die	mg/dl	No		78		1.1		100	0.92		0.85	0.91	0.78			0.79	0.87	0.8							0.9	30.1
Creatinine (J affe ?)	clinical chemistry	0.70-1.20	mg/dl	No							1.11
Creatinine i. morning urine (Jaffa)	clinical chemistry	0,36-2,37	g/l	No																		0.44							7626
Creatinine i. Urine (Jaffe)	clinical chemistry	0,36 -2,37	g/l	No																		0.44
creatinine kinase	clinical chemistry	<190	U/l	No							116
Gluc Urine	clinical chemistry			No				neg
glucose	clinical chemistry	60-99 or 68-126	mg/dl	Yes/No last measure	70-81			74			75								102			115.5					67			213
Glucose stabilized	clinical chemistry	60-100	mg/dl	Yes																		107							1385
Glucose test ser. neaatlv	clinical chemistry	neg		No							n																		284	51
GOT	clinical chemistry	<50	U/l	No		33					23							23		25							29		663	2.9
GPT	clinical chemistry	<50	U/l	No		43					23	31	96	21	28			20.3		26							27		8.36
HbA1c	clinical chemistry	<5.7	%	Yes																		5.7					5.6		265	150
HbA1c (IFCC)	clinical chemistry	<39	mmol/mol Hb	No/YES last measure																		38.2							10
Homa- Score (insulin)	clinical chemistry	<2(last 2.6-24.9)	Index	Yes																		2.5							9
Homocysteine	clinical chemistry	<15 or <13.9	umol/l	No														11.34				13.3
Myeloperoxidase	clinical chemistry	<632	ng/ml	No																		249							203/215
wrCRP	clinical chemistry	<5	mg/l	No																		<0.03							52
Lipoprotein	clinical chemistry/heart	<30	mg/dl	No														2.64
Lipoprotein-Phospholipase A2	clinical chemistry/heart	<639	U/l	No																		423
MDA-LDL	coronary artery disease marker	<40	U/l	Yes															68.2									16
lmidazoleacetic acid	DAO activity	440-3240	ug/g	No																		1270
lmidazoleacetic acid /histamin ratio	DAO activity	>30	ratio	No																		30.3							141
Blood sugar	diabetes	60-100	mg/dl	No											88
Ketone test str. negative	diabetes	neg		No							n																		1176.1
Ketone Urine	diabetes	neg		No				neg
Fat in stool	Digestive residues	<4.5	g/100g	No																	4
Protein in stool	Digestive residues	<1.4	g/100g	No																	1.2								31.9
Starch in stool	Digestive residues	2.6-10.6	g/100g	No																	8.8
Sugar content in stool	Digestive residues	<2	g/100g	No																	1.2
Water content in stool	Digestive residues	70.3-82.7	g/100g	No																	78
ACTH	endocrinology	7.2-63 and 4.7-48.8	ng/l	No			25															25.4					17.9
AUC (1-Max)	endocrinology	485-103943	Not provided	No																		27488
BDNF	endocrinology	>20.2	ng/ml	No																		35.8
FT3	endocrinology	2-4.4	pg/ml	No																				3.3			3.1
FT4	endocrinology	0.93-1.7 and 9.3-17	ng/dl and ng/l	No																				1.33			12.3
Glucagon	endocrinology	<209	ng/l	No																		198
Insulin basal	endocrinology	3.21-16.32	uIE/ml	No/Low almost significant last measure																		9.52
Pregenelone sulfate	endocrinology	27-80	ug/l	No																		72
fatty acids (total)	fatty acids	1600-1900	mg/l	Yes
monounsaturated fatty acids	fatty acids	250-750	mg/l	No
myristoleic acid	fatty acids	<32	mg/l	no
nervoic acid	fatty acids	6.9-16	mg/l	No																										132
olsic acid	fatty acids	332-575	mg/l	yes																										0.9	ommited	60.9 /1.83	57.8/1.73
palmitoleic acid	fatty acids	22-62	mg/l	yes
polyunsaturated fatty acids	fatty acids	600-1200	mg/l	No
Baderoides species	Flora	1x10"9 - 9x10"11	KBE/g	No																	2 X 10'9
Bifidobaderium species	Flora	1x10'9 - 9x10"11	KBE/g	No																	<1 X 10'8
Ci\robacter species	Flora	< 1x10"4	KBE/g	No																	<1 X 10' 4									<0.5
Clostridium species	Flora	< 1x10"6	KBE/g	No																	<1 X 10' 5
Enterobacter species	Flora	< 1x10·'4	KBE/g	n																	<1 X 10' 4
Enterooccus species	Flora	1x10'6 - 9x10"7	KBE/g	No																	<1 X 10'4								0.8
Escherichia coli	Flora	1x10"6 - 9x10'7	KBE/g	No																	<1 X 10' 4
Halnia alveii	Flora	< 1x10'4	KBE/g	No																	<1 X 10' 4
Klebsiella species	Flora	< 1x10"4	KBE/g	No																	<1 X 10' 4								0.6
Kluyvera species	Flora	< 1x10"4	KBE/g	No																	<1 X 10' 4
Ladobacillus species	Flora	1x10' 5 - 9x10"7	KBE/g	No																	<1 X 10'5								0.09
Morganella morganii	Flora	< 1x10'4	KBE/g	No																	<1 X 10' 4
Proteus species	Flora	< 1x10' 4	KBE/g	No																	<1 X 10' 4
Providencia species	Flora	< 1x10"4	KBE/g	No																	<1 X 10' 4
Pseudomonas species	Flora	< 1x10"4	KBE/g	No																	<1 X 10' 4
Serratia species	Flora	< 1x10"4	KBE/g	No																	<1 X 10' 4											544.9/1634.8	25.5/76.6
Spec. weight test str.	general	1.010-1.-20		No							+																			2.1
Test strip	general			No				xx
Blood / Urine	general health	neg		No				neg
Blood test ser. negative	general health	neg		No							n
Elweia/ Urine	general health			No				neg
Protein	general health	64-83	g/l	No							78								73	75							79
Protein test str. negative	general health	neg		No							n																		4
S-B-T 2 Serum bactericidal titer	general health	>30 or 27-36 (nov22)	mmol/l	Yes																29									0.19
S-B-T Serum bactericidal titer	general health	50- or 47-56 (nov22)	mmol/l	Yes																59.2
Osmolality, calculated mosmo/Ka	general health			No							290																			4.8
pH test str	general health	4.8-7.4		No							5.5
pH Urine	general health			No				6																					35
PK intra (Buffer capacity intracellular)	general health	>20	Not provided	no																30.3									115
anti-HBc	Hepatitis B core antibody			No										N															5.6
N-Methylhistamine	HNMT activity	108-299	ug/g	No																		220.6							37.3		no examination is carried out because the collected urine is not acidic	7//21	6.3/19
N-Methylimidazole	HNMT activity	1570-5080	ug/g	No																		3336							43.9/42
Ratio N-Methylhistamine/Histamine	HNMT activity	>6	ratio	Yes																		5.3
CO2 concentration	Hyperventilation	5	%	No																			3.3
oxygen concentration	Hyperventilation	15	%	No																			16.75
Oxygen uptake into the cell decrease	Hyperventilation			Yes																			0.291
CMV-IgG (EIA)	infection/serology	<6	U/ml	Yes														181
Cytomegalie-PCR-DNA	infection/serology	<35	IU/ml	No														neg
EBV-PCR-DNA	infection/serology	<35	copies/ml	No														neg
C-Peptid	insulin	0.3-0.7	nmol/l	No	0.2-1.8																								85
Histamine	intestine	<65.5	ng/ml	Yes															69.6
Cystaine	kidney	0.70-1.21	mg/l	No															0.94
eGFR	kidney	>60	mg/l	No
eGFR	kidney	>60	kA	No															109											0.8
eGFR	kidney		ml/min	No							>90
eGFR	kidney		ml/min	No							88
eGFR on cystaine	kidney	>60 kA		No															91.8
GFR	kidney	>60	ml/min	No				>60										109.2		115							104
MDRD	kidney			No		>70				86.3			112.9	108.7
Alkaline phosphatase	liver	<130	U/L	No		55		72										65.7	57	59
Bili / Urine	liver	neg		No				neg																					23
Bilirubin	liver	<20.52	Not provided	No		5.47																							1.12
Bilirubin direct	liver	<0.3	mg/dl	No															0.25											31.4
Bilirubin indirect	liver	<1	mg/dl	No															0.46
Bilirubin test ser. negative	liver	neg		No							n																			35.9
bilirubin total	liver	0.3-1.2	mg/dl	No														0.81	0.71								0.6
BSG	liver	<12	mm/h	No																							12			87.4
BSG 1h	liver	<12	mm/h	No															10										33.2
BSG 2h	liver	<12	mm/h	No															20
GOT (ASAT)	liver	9 to 50	U/l	No															20
GPT (ALAT)	liver	<45 or 10-50	U/l	Yes	233			>109											20
lipase	liver	13-60	U/l	No							26							23.1	30										12.2
Lipase	liver	13-60	U/l	Yes							63																				115 SU/ 427 SU/d	173/518	658/1973
Urobilinogen test str. negative	liver	neg		No							neg
Gamma-Glutamyl-Transferase (GGT)	liver/bile	12 to 64 or <71	U/l	No				26			17	26	60	31	31			34.6	29	35							41
Albumin	liver/kidney function	59.8-72.4 or 55.8-66.1	%	No															69.2	64.3							3.8
Albumin Q/1 35.0-52.0	liver/kidney function	35-52	Q/l	No							48.2
Alpha 1 anti1rypsin i. stool	Malabsorption/inflammation/leaky gut	<27.5	mg/dl	No																	<4.1								30.5/30.2
Calprotectin	Malabsorption/inflammation/leaky gut	<50	ug/g	No																	<19.5									8.1
Zonulin (stool)	Malabsorption/inflammation/leaky gut	<60	uU/g	No																	<14								33.9/34.5
ATP during blockage	Metabolic rate			No																		40.8
ATP in granulozyte	Metabolic rate	>0.4	nmol/10million cells	No																		1.08							90/87.6
ATP in granulozyte %	Metabolic rate	100		No																		100
ATP non blocked	Metabolic rate		%	No																		54.9
Alpha Lipoic acid	Micronutrients	>79	ng/l	No																		104
Coenzyme Q10	Micronutrients	700-1000	ng/ml	No																				879					99.9
Coenzyme Q10	Micronutrients	>0.67 (or >1.7)	mg/l	No																		3.03						1.81
Coenzyme Q10(cholesterol corrected)	Micronutrients	>0.16	umol/mmol Chol	No																		0.609								negat
DHA	Micronutrients	>8	%	No																		4.66
D-ratio vitamins D	Micronutrients	<4		No																		0.9
EPA	Micronutrients	>8	%	No																		1.41
Epa and DHA(Omega 3 index)	Micronutrients	>8	%	Yes																		6.07
Secretory lgA i. Stool	mucosal immunity	510-2040	umol/ml	No																	708.4
candida albicans	Mushrooms	< 1x10"3	KBE/g	No																	<1 X 10'3
candida species	Mushrooms	< 1x10"3	KBE/g	No																	<1 X 10'3
geotrichum species	Mushrooms	< 1x10"3	KBE/g	No																	<1 X 10'3
molds	Mushrooms	negativ	KBE/g	No																	NEG
alpha linoleic acid	omega 3	5.4-18.8	mg/l	No
arachidonic acid	omega 3	184-287	mg/l	Yes
arachidonic acid/ecosatrion index	omega 3	2.6-6.2	index	no
arachidonic acid/EPA ratio	omega 3	2.4-9	index	no
docosapentane acid	omega 3	1.4-9.6	mg/l	Yes
eicosatrien acid	omega 3	42-98	mg/l	Yes
EPA( eicosapentane acid)	omega 3	11 to 33	mg/l	Yes
gamma linoleic acid	omega 3	3.1-10.3	mg/l	No
lignocerin acid/nervon acid ratio	omega 3	0.4-1	index	no
linoleic acid	omega 3	476-691	mg/l	Yes
Omega 3 fatty acid	omega 3	50-250	mg/l	No
Omega 3 fatty acid (relative)	omega 3	5.5-10	%	No
Omega 3 fatty acid serum	omega 3	>8	%	No
Omega 6/Omega 3 fatty acid	omega 3/6	3.5-7	ratio	No
Omega 6 fatty acid	omega 6	600-1100	mg/l	Yes
omega 6 fatty acid (relative)	omega 6	34-42	%	No
DNS-Oxidation (8-OH-Desoxyguanosln)	oxidative stress	<12.9	ng/ml	No																		<4.8
Hydroperoxide level	oxidative stress	<140	U/l	Yes																279
Lipidperoxide	Oxidative stress	<180	umol/l	No																		<28							12.33
Methylmalonsäure i. Urin	oxidative stress	<1.89	mg/g	No																		0.7
AAK against adrenal cortex	protein kinase	1:<10		Yes			10
AAK against GAD	protein kinase	neg		No			0.6
AAK against IA2	protein kinase	neg		No			0.5
AAK against inseicell (ICA)	protein kinase	1:<10		No			10
HSR	rheumatoid arthritis?	3.4-7	Not provided	No		374.8							5.8																301/280	282
Anti-TG	tyroid	<115	IU/ml	No																							17
Androgen free index	urology	>20	%	No																						45.6			37	24
CRP	urology	<5	mg/l	No				<0.2			<0.3		6.4	<1					<1							<20	<5
DHEA-S	urology	88.9-427	ug/dl	Yes																						415	672		6.6	6.1
FSH	urology	0.7-11.1 or 1.40-18.10	mIU/ml	No																		3.13				2.41	2.8
LH	urology	0.8-7.6 and 1.7-8.6	mIU/ml	No																						2.9	4
LH basal	urology	1.50-9.3	mlU/ml	Yes																		0.84
Nitrite test	urology	neg		No							1.025
Nitrite Urine	urology	neg		No				neg
Ostradiol	urology	<56	pg/ml	No																						<20
PH-urine	urology			No																						7
Prolactin	urology	2.5-17	ng/ml	No																						7.1					no examination is carried out because the collected urine is not acidic	7.5/22.4	4.9/14.6
Prolactin	urology	86-324	uIU/ml	No																							155
SHBG	urology	10 to 57 or 18.3-54.1	nmol/l	No																						35.1	35.1
Urine gravity	urology			No																						1010
Urine status semiquantitative	urology			No							x																			829+
Folic acid (or folate)	vitamin	4.6-18.7	ug/l or ng/ml	No							4.7																	6.94
folic acid storage status	vitamin	480-1210	ng/ml	No																				624
ANCA		<1:10		No
beta 2-glycoprotein-IgG		<20	RE/ml	No
beta 2-glycoprotein-IgM		<20	RE/ml	No																										31.3
C-ANCA		<20	RE/ml	No																									107.9
cardiolipin-IgG		<12	PL-U/ml	No																									269.7
cardiolipin-IgM		<12	PL-U/ml	No
creatin kinase		<190	U/l	No
ENA=Extractable nuclei antigens		negativ		No
gamma GT		<60	U/l	Yes
glucose (mean glucose value)		80-114	mg/dl	Yes
INR (internat. normal. ratio)		< 1.20	Not provided	No				1.1			1.03									1.05
LDH		<250	U/l	No
LUC		0-0.6	%	No														0
P-ANCA		<20	U/ml	No
rheumatoid factor		<14	U/ml	No																									6.16
saturated multiaxial FS ratio		0.6-0.9	index	no
saturated ratio		33-37	% FS	Yes
saturated simple FS ratio		1.6-2	index	Yes
TAK (thyreoglobulin-AK)		<4.5	IU/ml	No
Triglyceride		<200	mg/dl	No
